# Supplementary material for: Implications of dynamic imine chemistry for the sustainable synthesis of nitrogen heterocycles via transimination followed by intramolecular cyclisation
Source: Royal Society of Chemistry journal article supplement (doi:10.1039/c5ob02670a), 2016-01-01
Supplement: c5ob02670a1.pdf [file c5ob02670a1.pdf]

## Supporting Information

### **Implications of dynamic imine chemistry to the sustainable synthesis of nitrogen heterocycles via transimination followed by intramolecular cyclisation**

*Joydev K. Laha,\* K. S. Satyanarayana Tummalapalli, and Krupal P. Jethava*

Department of Pharmaceutical Technology (Process Chemistry)

National Institute of Pharmaceutical Education and Research

S. A. S. Nagar, Punjab 160062

INDIA





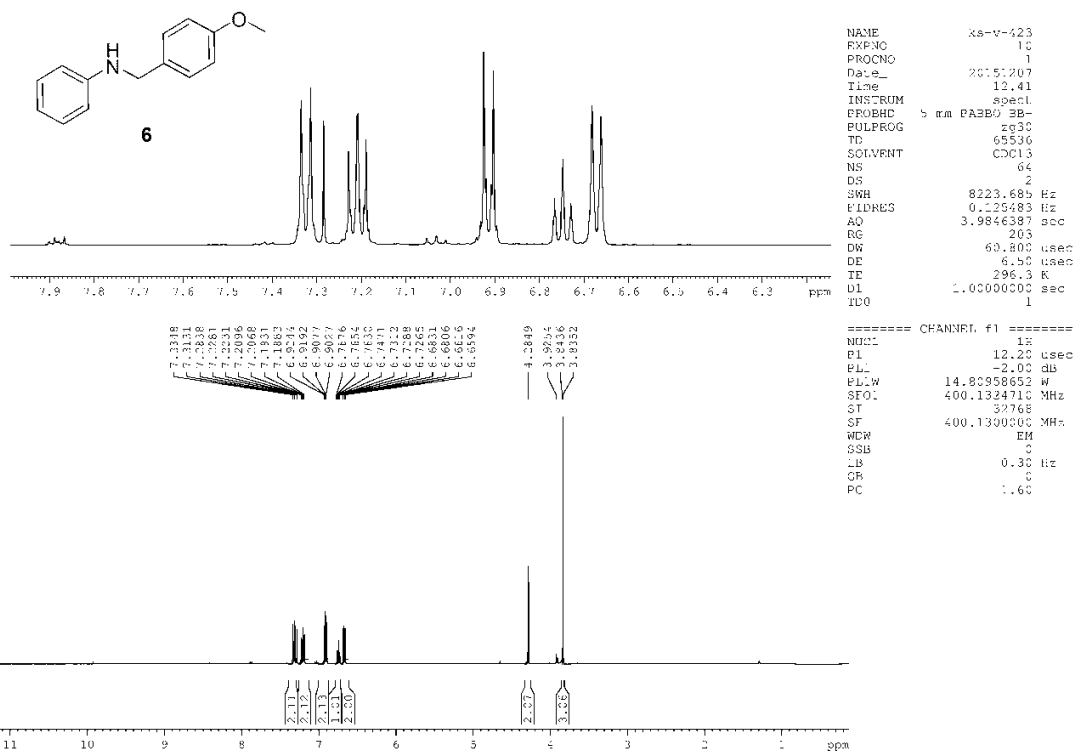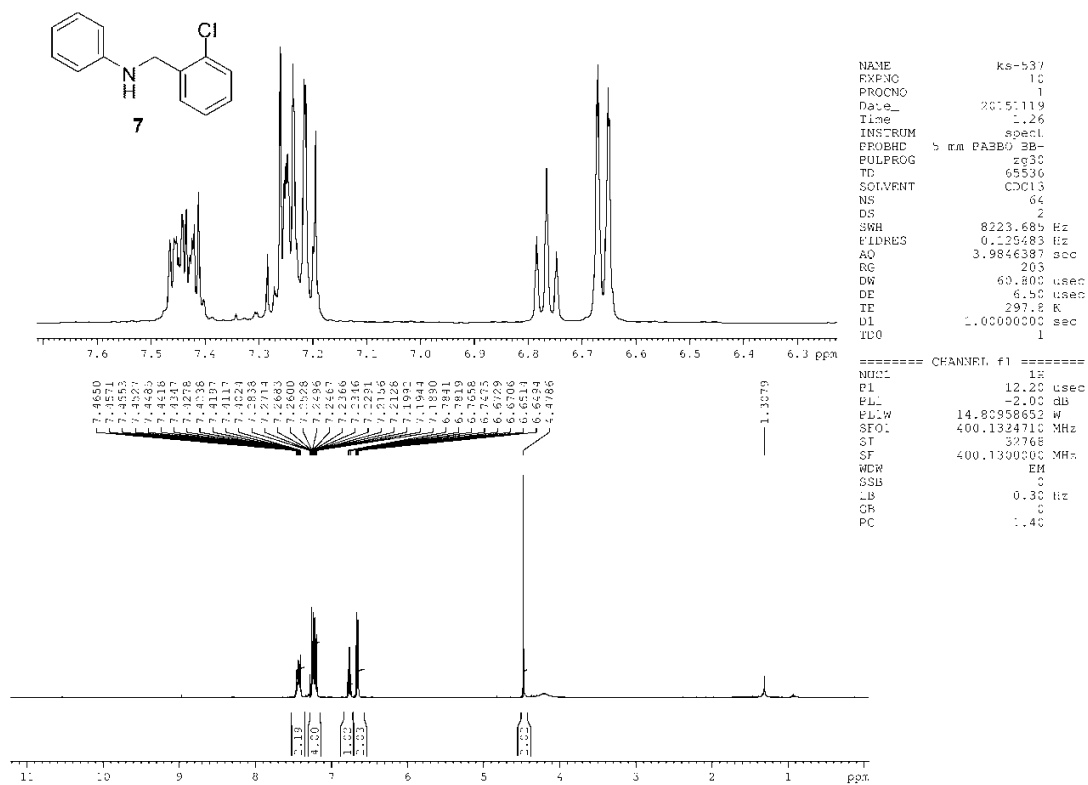

ks-537  
 C13CPD CDCl3 (D:\CIL\JKLara\_108\NMR\2015\Nov) Administrator 20

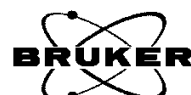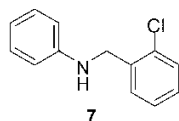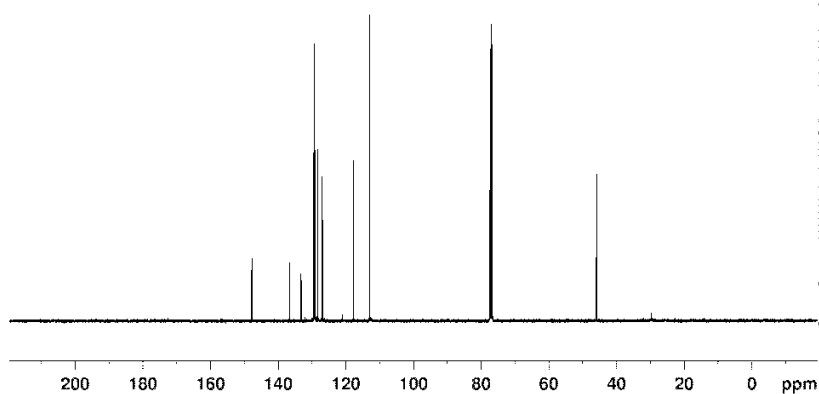

```

NAME      ks-537
EXPNO    1
PROCNO   1
Date_    20151119
Time     2.25
INSTRUM  spect
PROBHD   5 mm PABBO BB-
PULPROG  zgpg30
TD       65536
SOLVENT  CDCl3
NS       1024
DS       4
SWH      24038.46 Hz
FIDRES   0.366738 Hz
AQ       1.363198 sec
RG       203
DW       20.300 usec
DE       6.50 usec
TE       293.5 K
D1       2.0000000 sec
D11      0.3300000 sec
TD0      .
  
```

```

----- CHANNEL f1 -----
NUC1     13C
P1       9.50 usec
PL1     -1.00 dB
PL1W    44.90434265 W
SFO1    100.6228938 MHz
  
```

```

===== CHANNEL f2 =====
CFDPRG2  waitz15
NUC2     1H
PCPD2    89.00 usec
PL2     -2.00 dB
PL12    14.33 dB
PL13    18.33 dB
PL2W    14.30958652 W
PL12W   0.34478072 W
PL13W   0.13725965 W
SFO2    400.1316005 MHz
SI       32768
SF       100.6127630 MHz
WDW      EM
SSB      0
LB       1.00 Hz
GB       0
PC       1.40
  
```

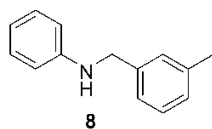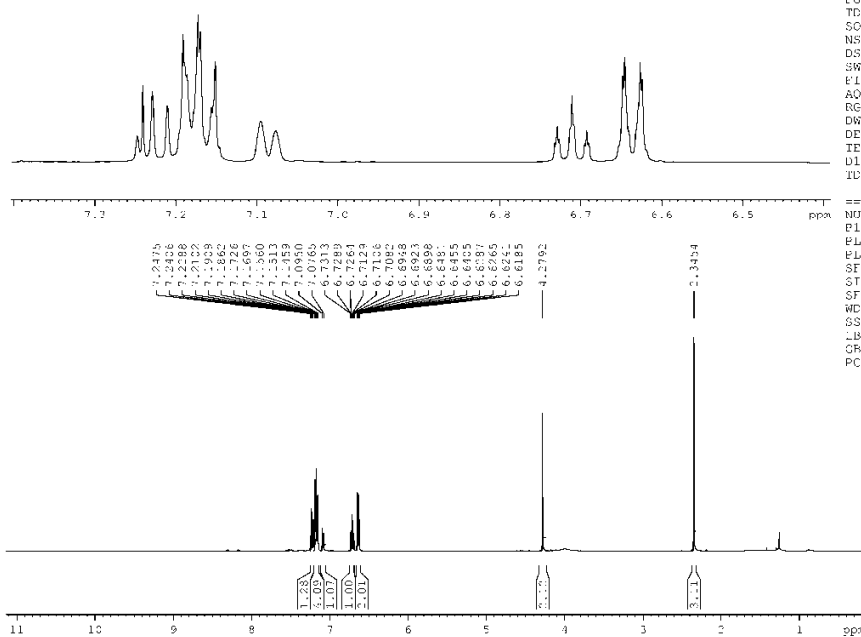

```

NAME      ks-V-424
EXPNO    1
PROCNO   1
Date_    20150722
Time     11.52
INSTRUM  spect
PROBHD   5 mm PABBO BB-
PULPROG  zg30
TD       65536
SOLVENT  CDCl3
NS       64
DS       2
SWH      8223.685 Hz
FIDRES   0.125483 Hz
AQ       3.9846387 sec
RG       203
DW       60.800 usec
DE       6.50 usec
TE       297.8 K
D1       1.0000000 sec
TD0      1
  
```

```

===== CHANNEL f1 =====
NUC1     1H
P1       12.20 usec
PL1     -2.00 dB
PL1W    14.80398652 W
SFO1    400.1324111 MHz
SI       32768
SF       400.1300174 MHz
WDW      EM
SSB      0
LB       0.30 Hz
GB       0
PC       1.40
  
```

ks-v-424  
 C13CPD CDCl3 {D:\CIL\JKLabz\_108\NMR\2015\July} Administrator 17

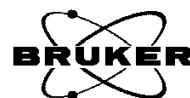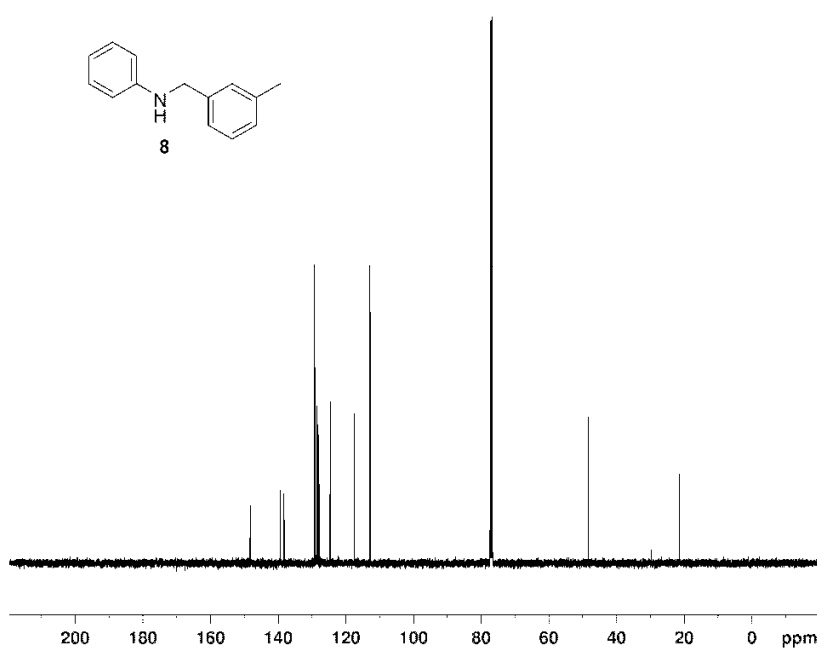

```

NAME      ks v 424
EXPNO    1
PROCNO   1
Date_    20150722
Time     17.30
INSTRUM  spect
PROBHD   5 mm PABBO BB-
PULPROG  zgpg30
TD        65536
SOLVENT  CDCl3
NS        4
DS        2
SWH       24038.461 Hz
FIDRES    0.366798 Hz
AQ        1.3631988 sec
RG         203
DW        20.500 usec
DE        6.50 usec
TE        298.5 K
D1        2.3600000 sec
D11       0.3300000 sec
TD0       1

===== CHANNEL f1 =====
NUC1      13C
P1        9.50 usec
PL1       1.00 dB
PL1W      44.96434265 W
SFO1      100.6228298 MHz

===== CHANNEL f2 =====
CPDPRG2   waitz15
NUC2       1H
PCPD2     80.00 usec
PF2       -2.00 dB
PL12      14.33 dB
PL13      18.33 dB
PL1W      14.80958652 W
PL12W     0.34478072 W
PL13W     0.13725966 W
SFO2      400.1316005 MHz
SI         32768
SF        100.6127690 MHz
WDW       EM
SSB       0
LB        1.00 Hz
GB         0
PC        1.40
  
```

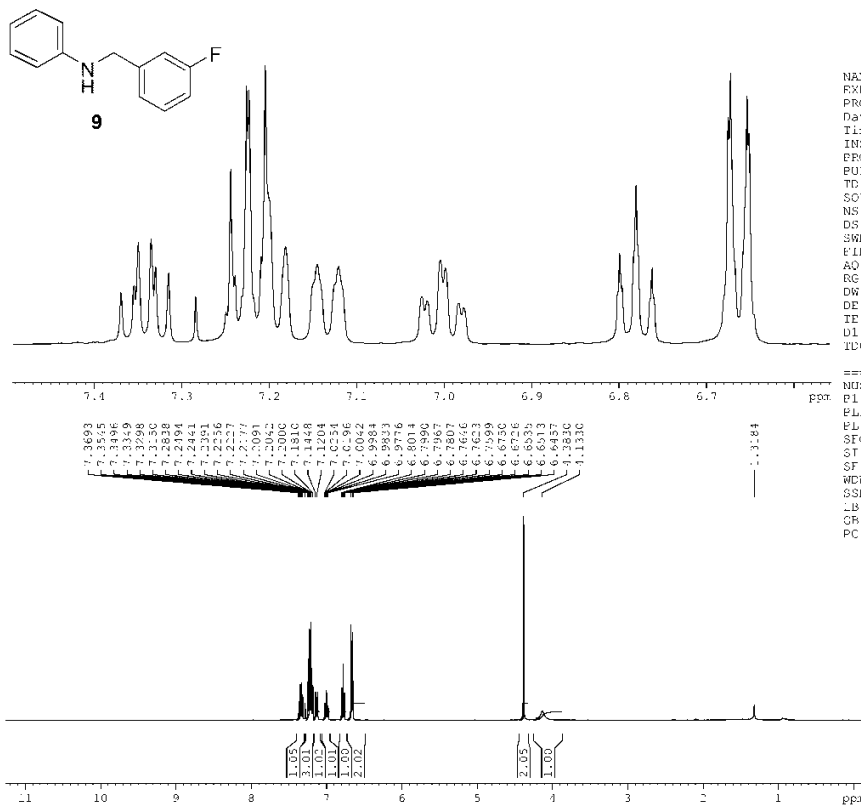

```

NAME      ks-536
EXPNO    1
PROCNO   1
Date_    20151119
Time     0.16
INSTRUM  spect
PROBHD   5 mm PABBO BB-
PULPROG  zg30
TD        65536
SOLVENT  CDCl3
NS        64
DS        2
SWH       8223.685 Hz
FIDRES    0.129483 Hz
AQ        3.9846387 sec
RG         161
DW        60.800 usec
DE        6.50 usec
TE        297.9 K
D1        1.0000000 sec
TD0       1

===== CHANNEL f1 =====
NUC1      1H
P1        12.00 usec
PL1       -2.00 dB
PL1W      14.80958652 W
SFO1      400.1324710 MHz
SI         32768
SF        400.1300000 MHz
WDW       EM
SSB       0
LB        0.30 Hz
GB         0
PC        1.40
  
```

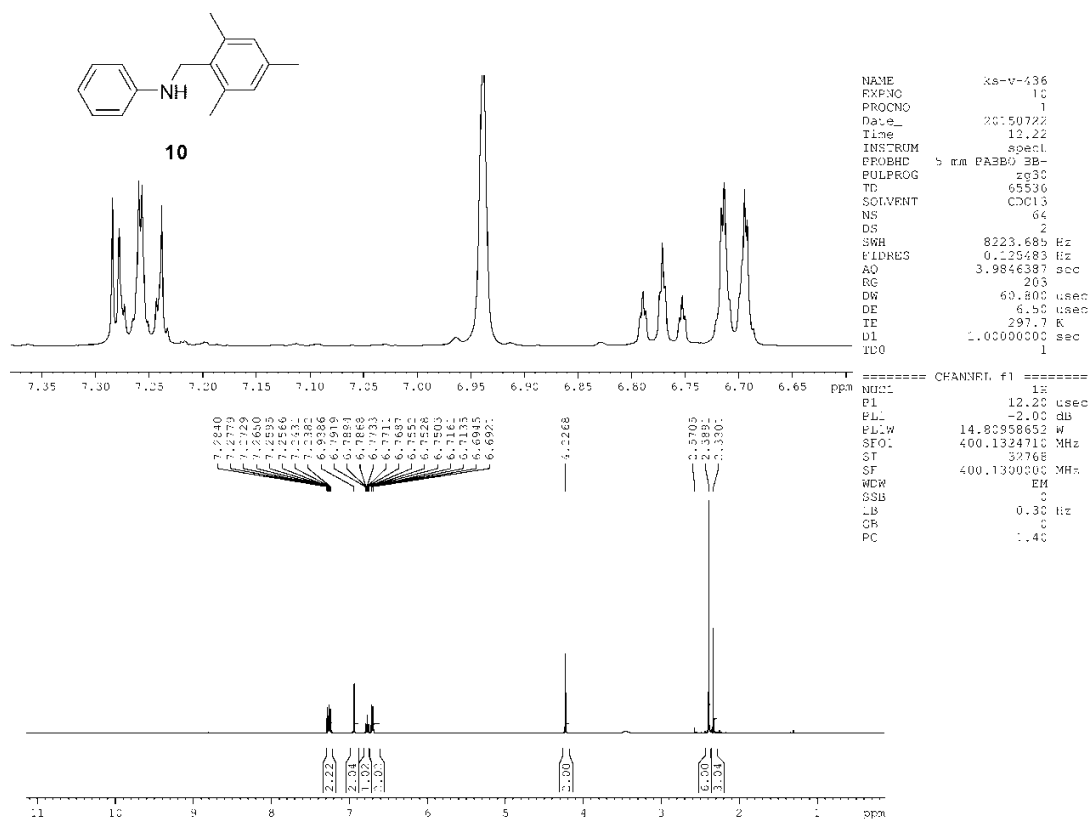

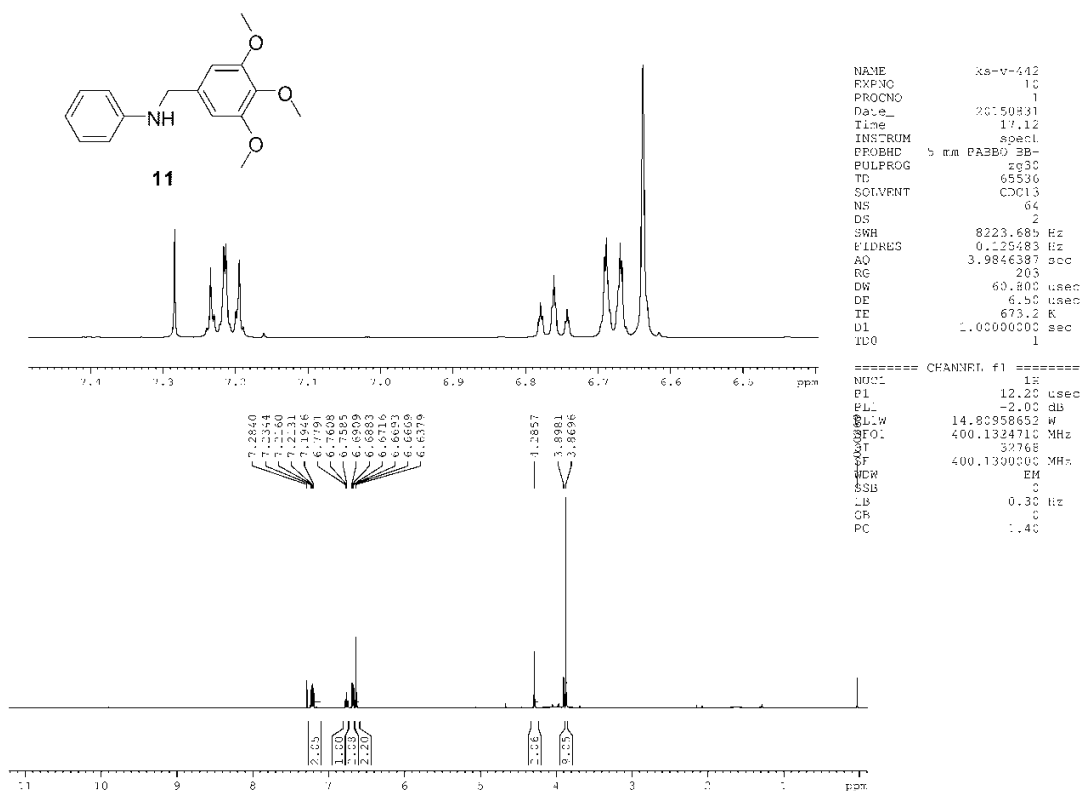

ks-v-442  
C13CPD CDCl3 (D:\NCIL\JKLaha\_108\NMR\2015\Aug) Administrator 24

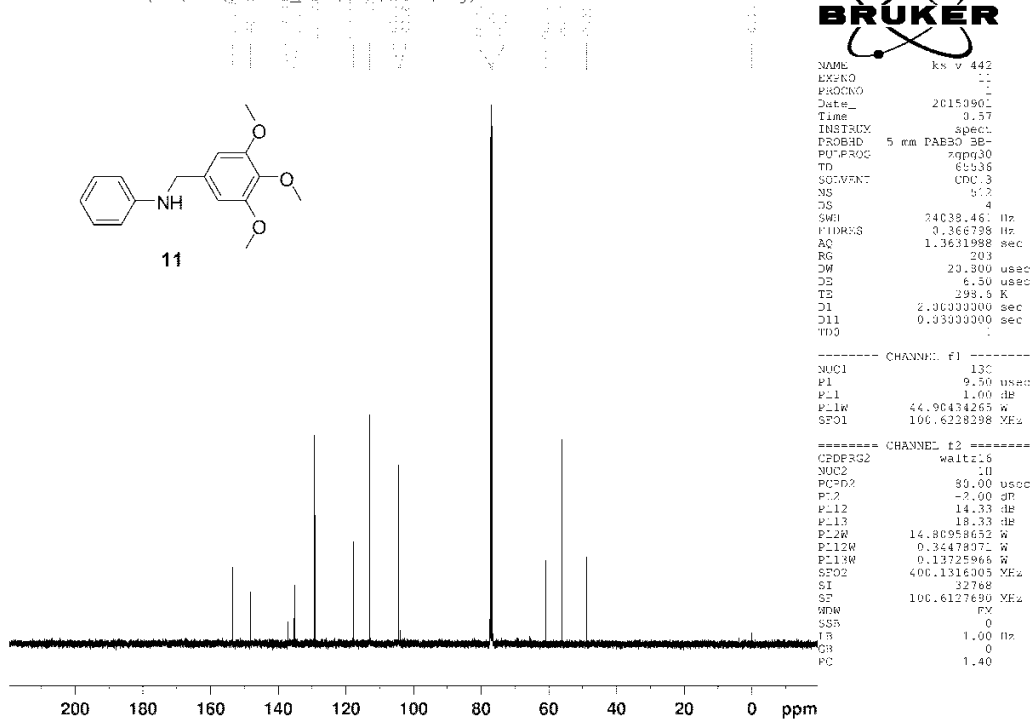





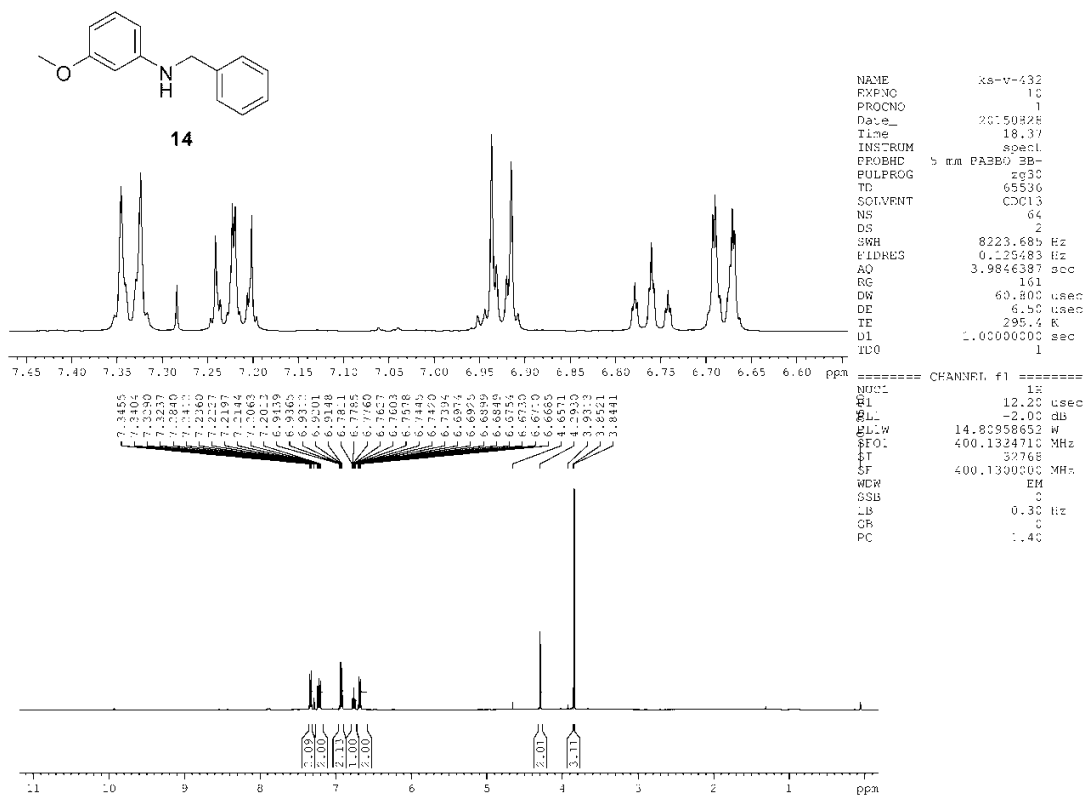

ks-v-432  
 C13CPD5.L2 CDCl3 (D:\C1L\JKLaha\_108\NMR\2015\Aug; Administrator 23

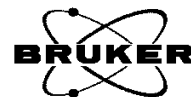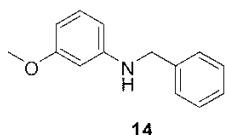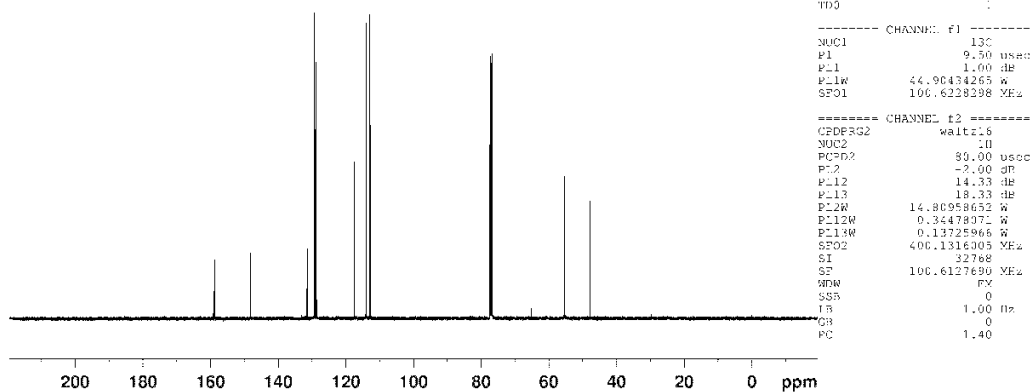

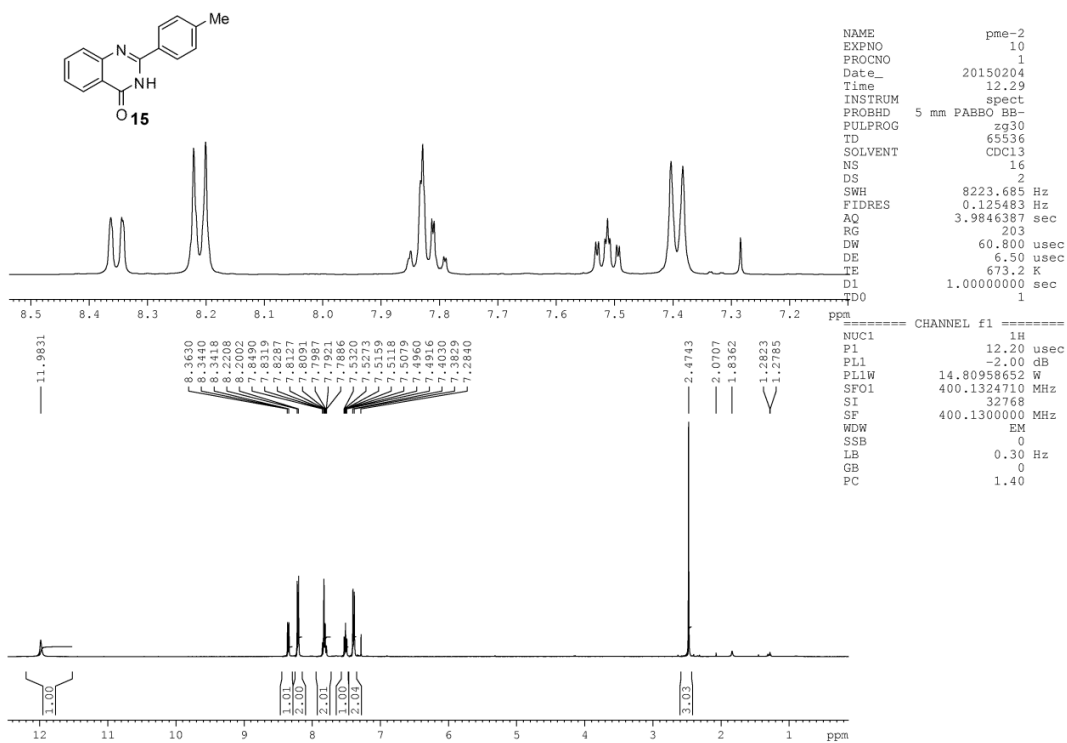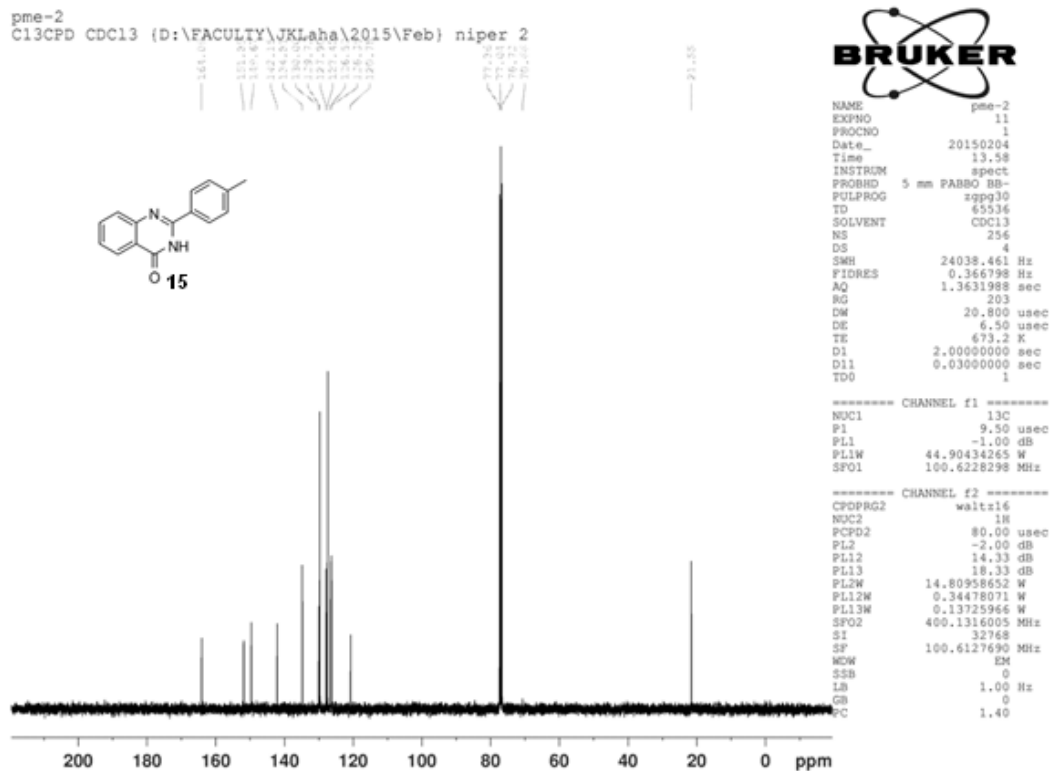

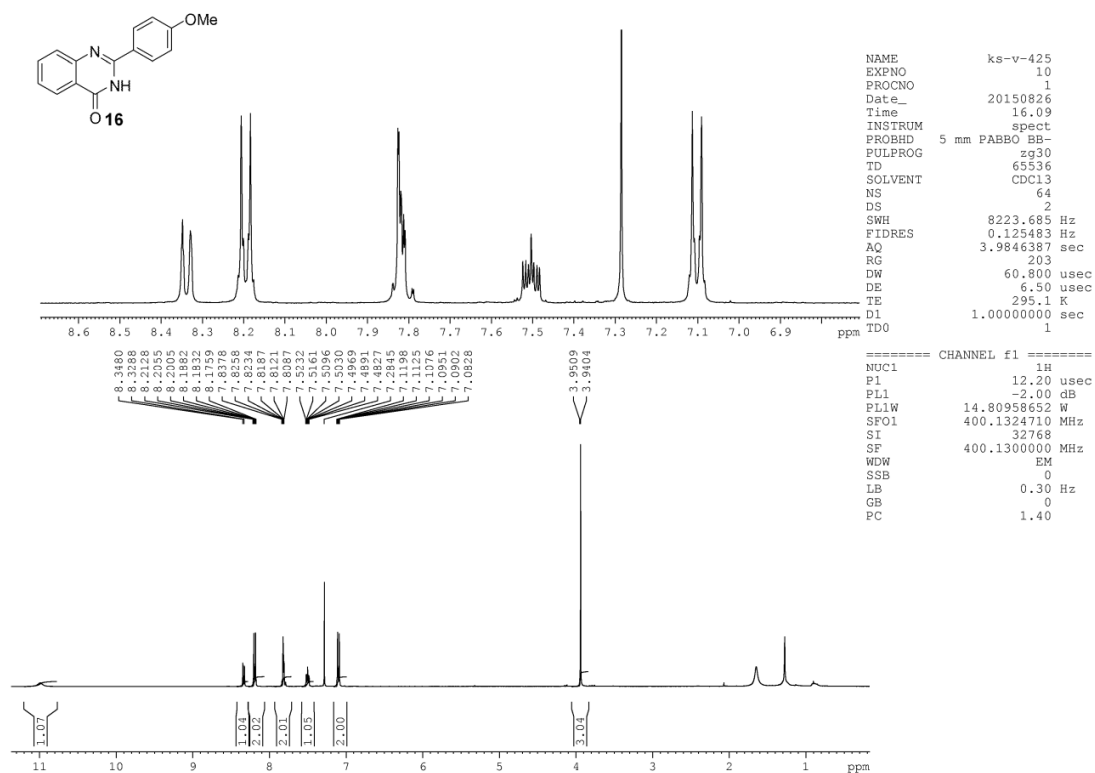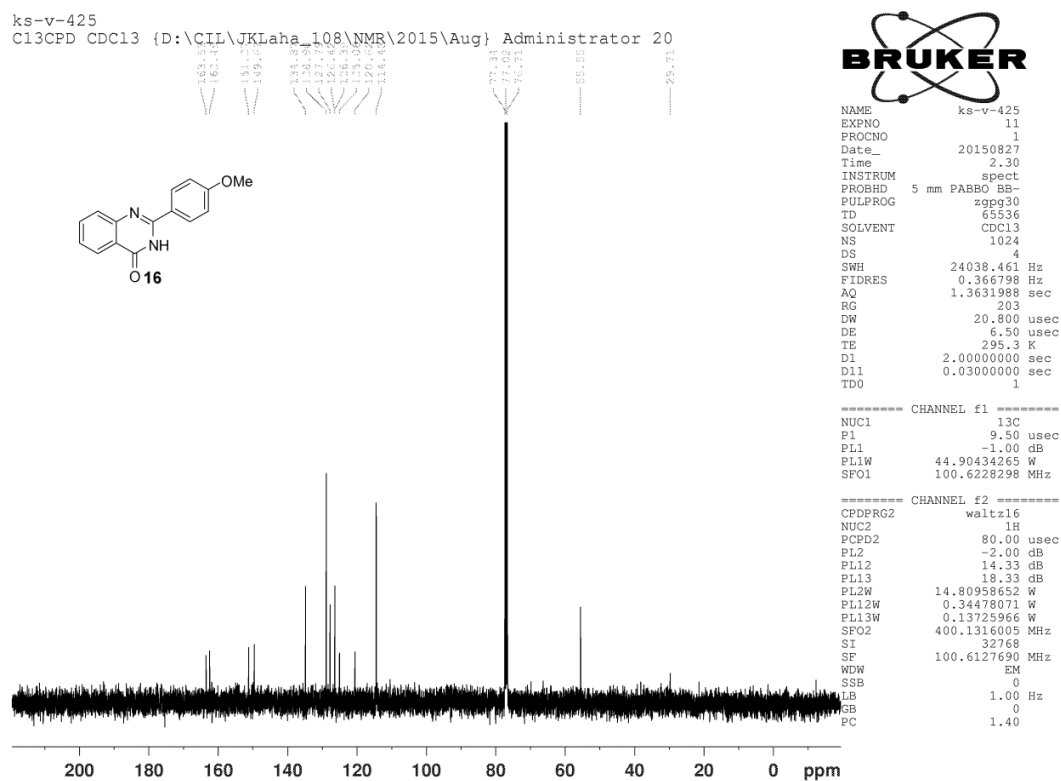



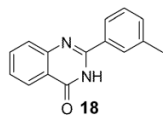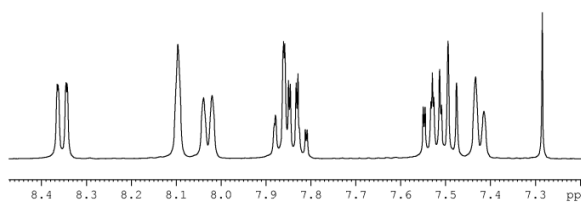

```

NAME      ks-v-429-f
EXPNO    10
PROCNO   1
Date_    20150917
Time     16.08
INSTRUM  spect
PROBHD   5 mm PABBO BB-
PULPROG  zg30
TD       65536
SOLVENT  CDCl3
NS       64
DS       2
SWH      8223.685 Hz
AQ       0.125483 Hz
FIDRES   3.9846387 sec
RG       203
DW       60.800 usec
DE       6.50 usec
TE       297.8 K
D1       1.00000000 sec
TD0     1
    
```

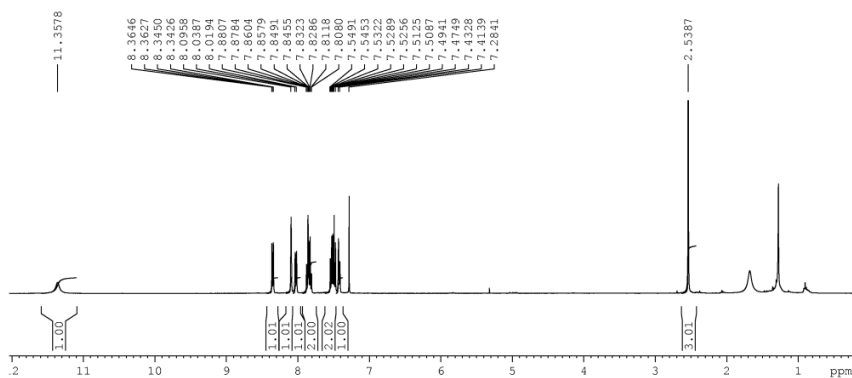

```

===== CHANNEL f1 =====
NUC1    1H
P1      12.20 usec
PL1     -2.00 dB
PL1W    14.80958652 W
SFO1    400.1324710 MHz
SI      32768
SF      400.1300000 MHz
WDW     EM
SSB     0
LB      0.30 Hz
GB      0
PC      1.40
    
```

ks-v-429-f  
C13CPD512 CDCl3 (D:\CII\JKLaha\_108\NMR\2015\Sep) Administrator 27

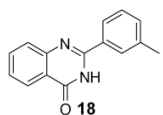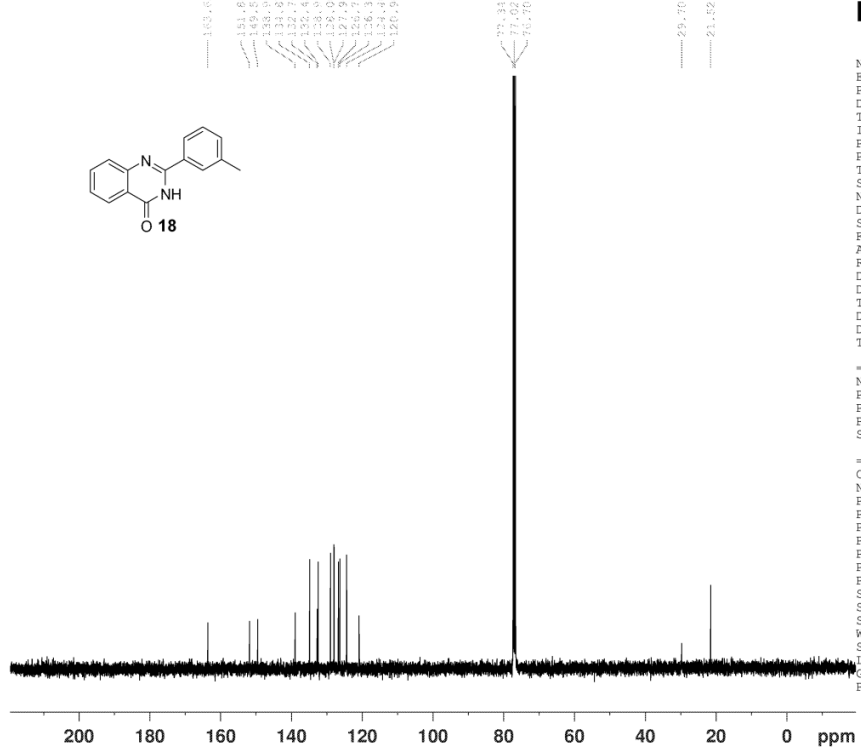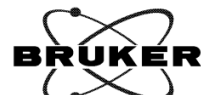

```

NAME      ks-v-429-f
EXPNO    11
PROCNO   1
Date_    20150918
Time     4.17
INSTRUM  spect
PROBHD   5 mm PABBO BB-
PULPROG  zgpg30
TD       65536
SOLVENT  CDCl3
NS       512
DS       4
SWH      24038.461 Hz
AQ       0.366798 Hz
FIDRES   1.3631988 sec
RG       203
DW       20.800 usec
DE       6.50 usec
TE       673.2 K
D1       2.00000000 sec
D11      0.03000000 sec
TD0     1
    
```

```

===== CHANNEL f1 =====
NUC1    13C
P1      9.50 usec
PL1     -1.00 dB
PL1W    44.90434265 W
SFO1    100.6228298 MHz
    
```

```

===== CHANNEL f2 =====
CPDPRG2  waltz16
NUC2     1H
PCPD2    80.00 usec
PL2     -2.00 dB
PL12    14.33 dB
PL13    18.33 dB
PL2W    14.80958652 W
PL12W   0.34478071 W
PL13W   0.13725966 W
SFO2    400.1316005 MHz
SI      32768
SF      100.6127690 MHz
WDW     EM
SSB     0
LB      1.00 Hz
GB      0
PC      1.40
    
```

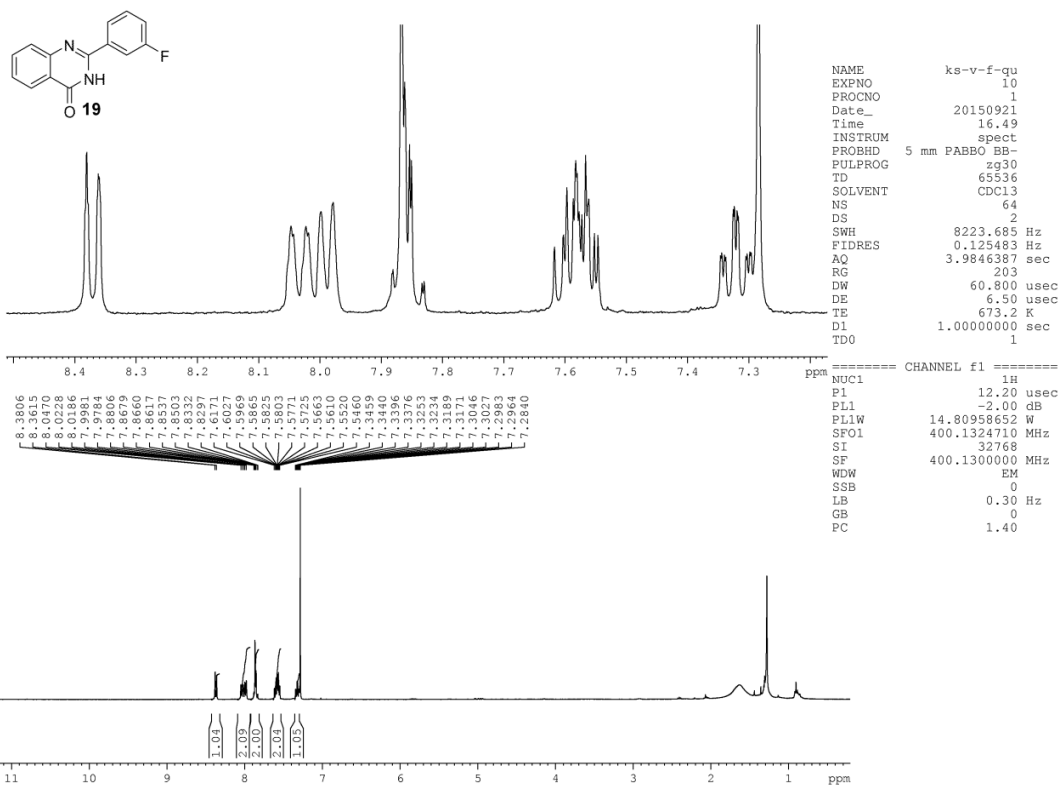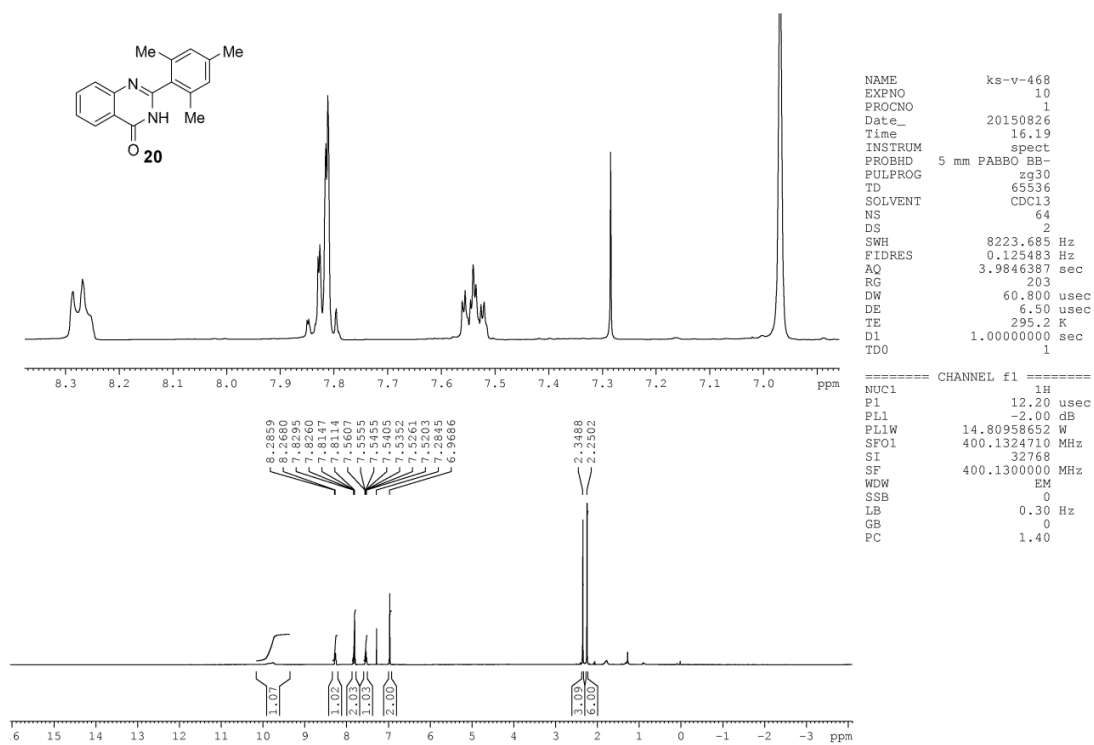





ks-v-469  
 C13CPD CDC13 (D:\CIL\JKLaha\_108\NMR\2015\Aug) Administrator 22

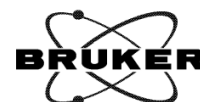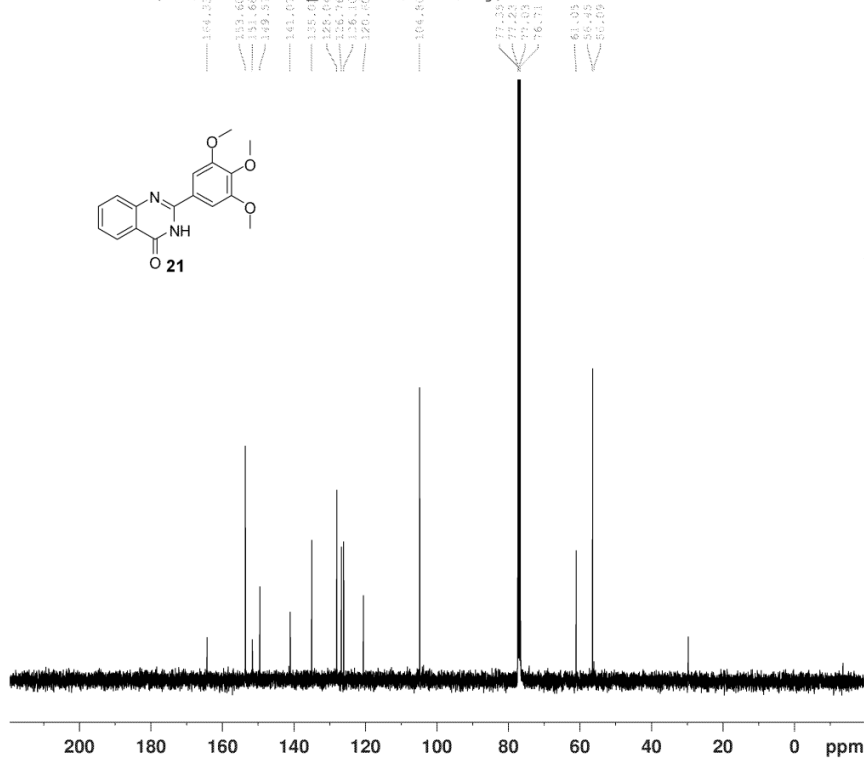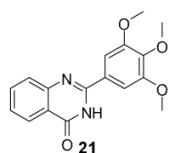

NAME ks-v-469  
 EXPNO 11  
 PROCNO 1  
 Date\_ 20150827  
 Time 4.35  
 INSTRUM spect  
 PROBHD 5 mm PABBO BB  
 PULPROG zgpg30  
 TD 65536  
 SOLVENT CDC13  
 NS 1024  
 DS 4  
 SWH 24038.461 Hz  
 FIDRES 0.366798 Hz  
 AQ 1.3631988 sec  
 RG 203  
 DW 20.800 usec  
 DE 6.50 usec  
 TE 295.0 K  
 D1 2.00000000 sec  
 D11 0.03000000 sec  
 TD0 1

===== CHANNEL f1 =====  
 NUC1 13C  
 P1 9.50 usec  
 PL1 -1.00 dB  
 PL1W 44.90434265 W  
 SFO1 100.6228298 MHz

===== CHANNEL f2 =====  
 CDPBRG2 waitz16  
 NUC2 1H  
 PCPD2 80.00 usec  
 PL2 -2.00 dB  
 PL12 14.33 dB  
 PL13 18.33 dB  
 PL2W 14.80958652 W  
 PL12W 0.34478071 W  
 PL13W 0.13725966 W  
 SFO2 400.1316005 MHz  
 SI 32768  
 SF 100.6127690 MHz  
 WDW EM  
 SSB 0  
 LB 1.00 Hz  
 GB 0  
 PC 1.40

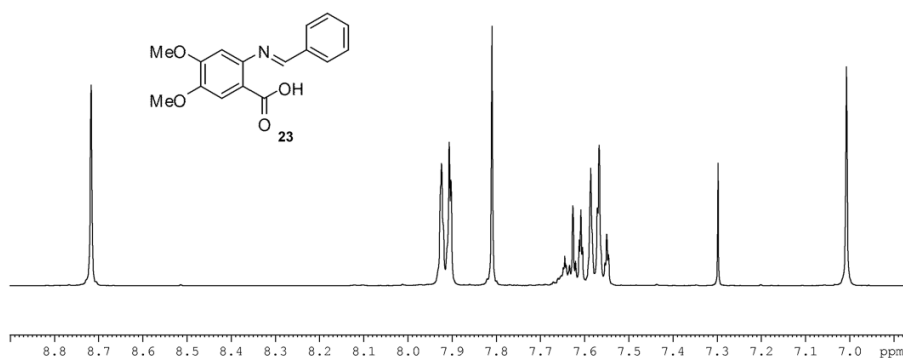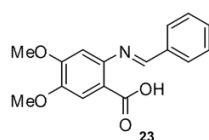

NAME an-2  
 EXPNO 10  
 PROCNO 1  
 Date\_ 20150924  
 Time 18.35  
 INSTRUM spect  
 PROBHD 5 mm PABBO BB  
 PULPROG zg30  
 TD 65536  
 SOLVENT CDC13  
 NS 64  
 DS 2  
 SWH 8223.685 Hz  
 FIDRES 0.125483 Hz  
 AQ 3.9846387 sec  
 RG 203  
 DW 60.800 usec  
 DE 6.50 usec  
 TE 673.2 K  
 D1 1.00000000 sec  
 TD0 1

===== CHANNEL f1 =====  
 NUC1 1H  
 P1 12.20 usec  
 PL1 -2.00 dB  
 PL1W 14.80958652 W  
 SFO1 400.1324710 MHz  
 SI 32768  
 SF 400.1300000 MHz  
 WDW EM  
 SSB 0  
 LB 0.30 Hz  
 GB 0  
 PC 1.40

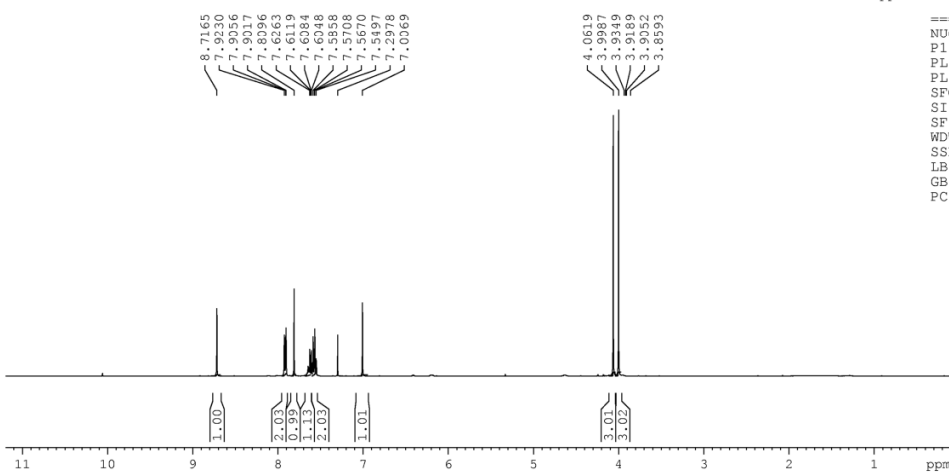

ks-im-ay  
 C13CPD CDC13 (D:\CIL\JKLaha\_108\NMR\2015\Aug) Administrator 25

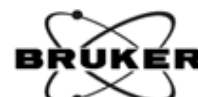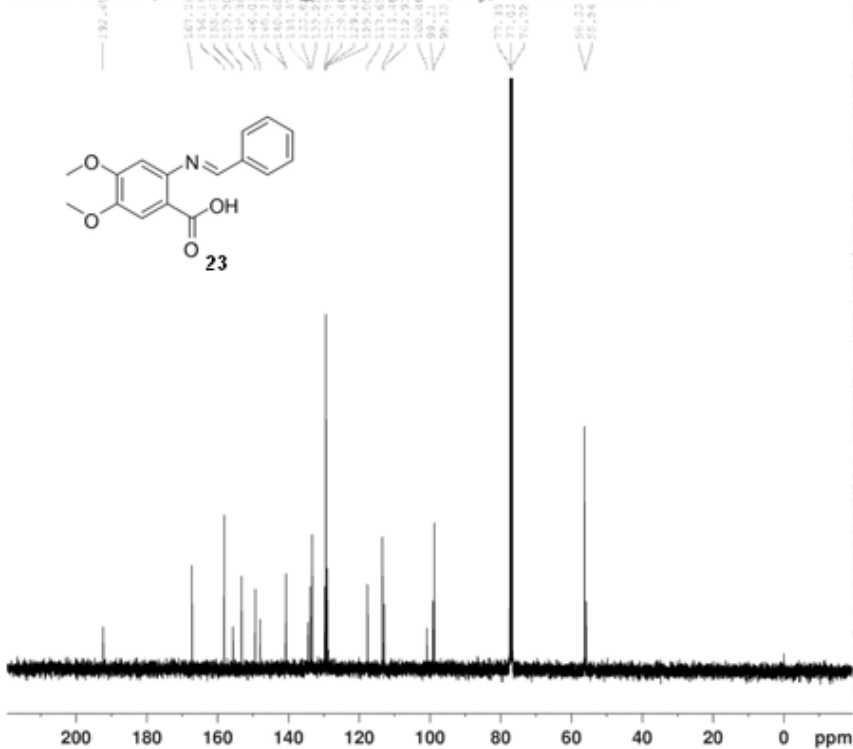

NAME ks-im-ay  
 EXPNO 10  
 PROCNO 1  
 Date\_ 20150819  
 Time 22.27  
 INSTRUM spect  
 PROBHD 5 mm PABBO BB-  
 PULPROG zgpg30  
 TD 65536  
 SOLVENT CDC13  
 NS 1024  
 DS 4  
 SWH 24038.461 Hz  
 FIDRES 0.366798 Hz  
 AQ 1.3631988 sec  
 RG 203  
 DM 20.800 usec  
 DE 6.50 usec  
 TE 673.2 K  
 D1 2.00000000 sec  
 D11 0.03000000 sec  
 TD0 1

==== CHANNEL f1 =====  
 NUC1 13C  
 P1 9.50 usec  
 PL1 -1.00 dB  
 PL1W 44.90434265 W  
 SFO1 100.6228298 MHz

==== CHANNEL f2 =====  
 CPDPRG2 waltz16  
 NUC2 1H  
 PCPD2 80.00 usec  
 PL2 -2.00 dB  
 PL12 14.33 dB  
 PL13 18.33 dB  
 PL2W 14.80958652 W  
 PL12W 0.34478071 W  
 PL13W 0.13725966 W  
 SFO2 400.1316005 MHz  
 SI 32768  
 SF 100.6127690 MHz  
 MDW EM  
 SSB 0  
 LB 1.00 Hz  
 GB 0  
 PC 1.40

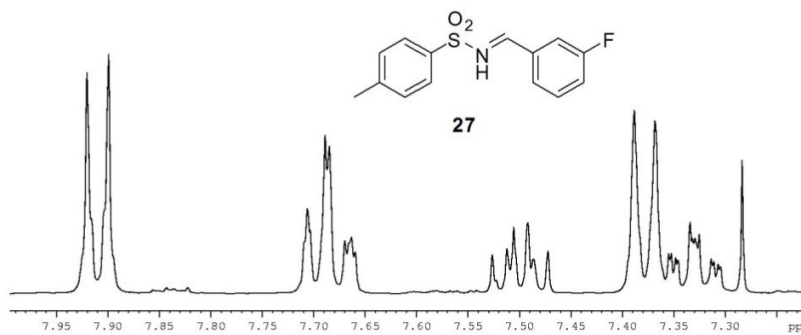

NAME jkp-3f  
 EXPNO 10  
 PROCNO 1  
 Date\_ 20151021  
 Time 15.14  
 INSTRUM spect  
 PROBHD 5 mm PABBO BB-  
 PULPROG zg30  
 TD 65536  
 SOLVENT CDC13  
 NS 16  
 DS 2  
 SWH 8223.685 Hz  
 FIDRES 0.125483 Hz  
 AQ 3.9846387 sec  
 RG 203  
 DM 60.800 usec  
 DE 6.50 usec  
 TE 299.3 K  
 D1 1.00000000 sec  
 TD0 1

==== CHANNEL f1 =====  
 NUC1 1H  
 P1 12.20 usec  
 PL1 -2.00 dB  
 PL1W 14.80958652 W  
 SFO1 400.1324710 MHz  
 SI 32768  
 SF 400.1300000 MHz  
 MDW EM  
 SSB 0  
 LB 0.30 Hz  
 GB 0  
 PC 1.40

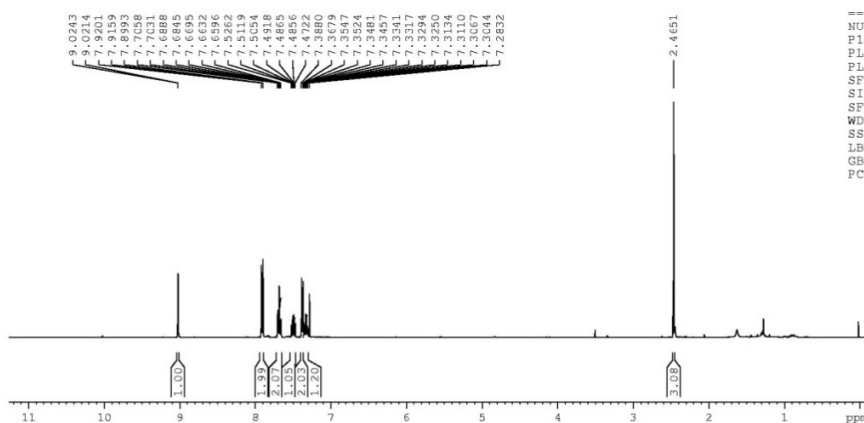

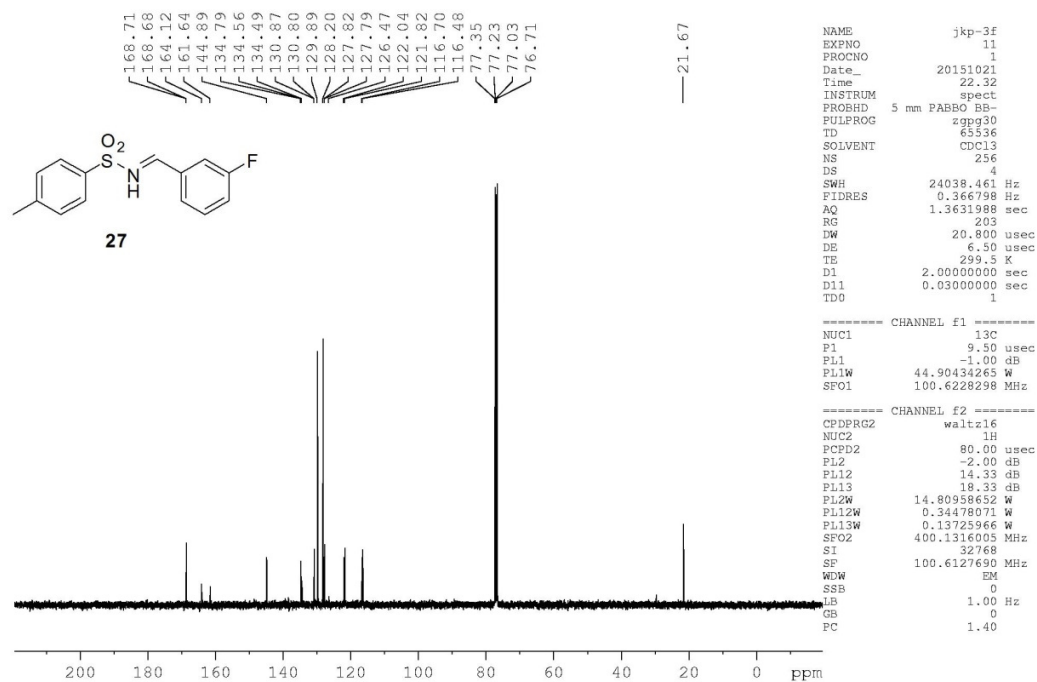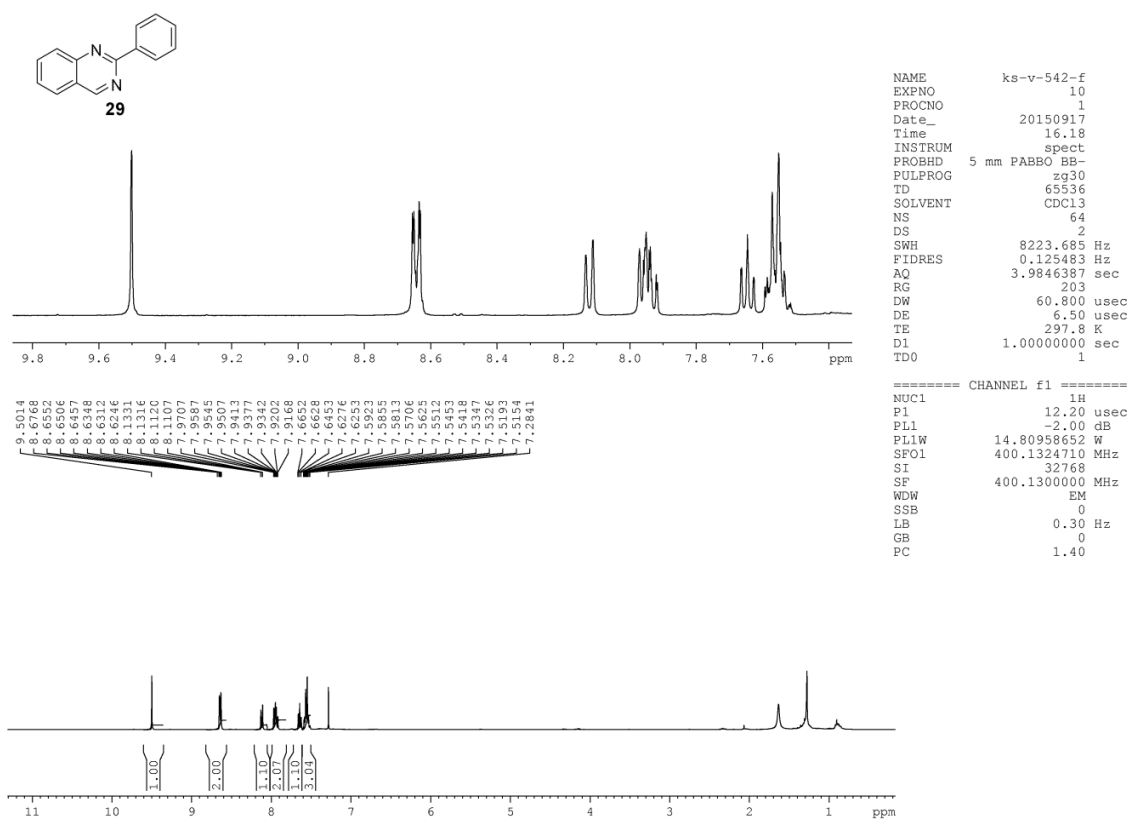

ks-v-542-f  
C13CPD512 CDC13 (D:\CIL\JKLaha\_108\NMR\2015\Sep) Administrator 28

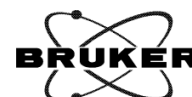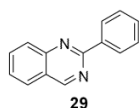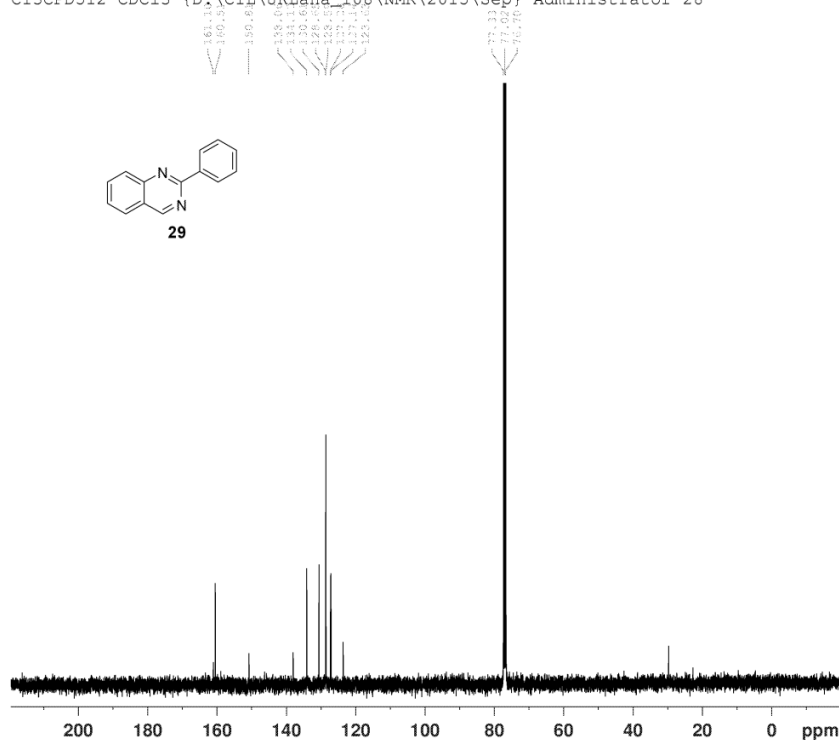

```

NAME      ks-v-542-f
EXPNO     11
PROCNO    1
Date_     20150918
Time      4.50
INSTRUM   spect
PROBHD    5 mm PABBO BB-
PULPROG   zgpg30
TD        65536
SOLVENT   CDC13
NS        512
DS        4
SWH       24038.461 Hz
FIDRES    0.366798 Hz
AQ        1.3631988 sec
RG        203
DW        20.800 usec
DE        6.50 usec
TE        673.2 K
D1        2.00000000 sec
D11       0.03000000 sec
TD0       1

===== CHANNEL f1 =====
NUC1      13C
P1        9.50 usec
PL1       -1.00 dB
PL1W     44.90434265 W
SFO1     100.6228298 MHz

===== CHANNEL f2 =====
CPDPRG2   waltz16
NUC2      1H
PCPD2     80.00 usec
PL2       -2.00 dB
PL12     14.33 dB
PL13     19.33 dB
PL2W     14.80958652 W
PL12W    0.34478071 W
PL13W    0.13725966 W
SFO2     400.1316005 MHz
SI        32768
SF        100.6127690 MHz
WDW       EM
SSB       0
LB        1.00 Hz
GB        0
PC        1.40

```

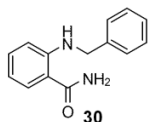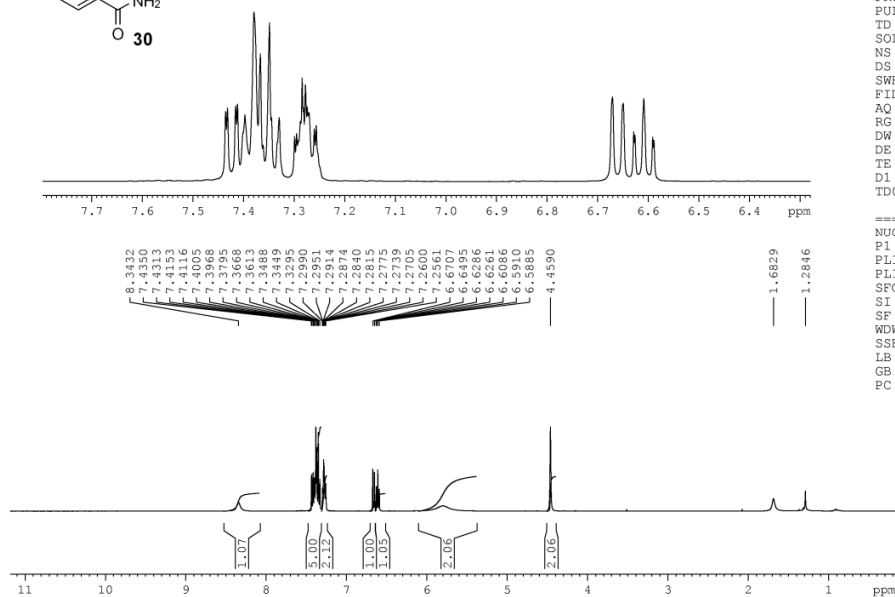

```

NAME      ks-v-1-a
EXPNO     10
PROCNO    1
Date_     20150921
Time      16.58
INSTRUM   spect
PROBHD    5 mm PABBO BB-
PULPROG   zg30
TD        65536
SOLVENT   CDC13
NS        64
DS        2
SWH       8223.695 Hz
FIDRES    0.125483 Hz
AQ        3.9846387 sec
RG        203
DW        60.800 usec
DE        6.50 usec
TE        673.2 K
D1        1.00000000 sec
TD0       1

===== CHANNEL f1 =====
NUC1      1H
P1        12.20 usec
PL1       -2.00 dB
PL1W     14.80958652 W
SFO1     400.1324710 MHz
SI        32768
SF        400.1300000 MHz
WDW       EM
SSB       0
LB        0.30 Hz
GB        0
PC        1.40

```

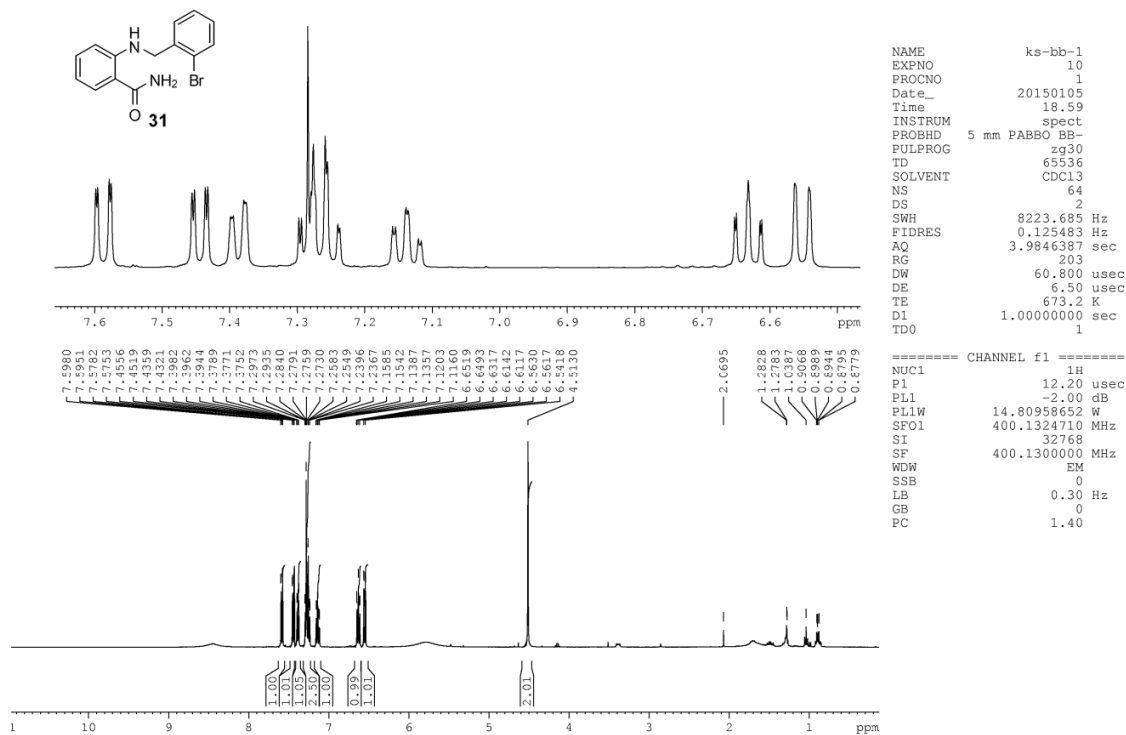

ks-bb-1  
 C13CPD CDCl3 (D:\FACULTY\JKL\lab\2015\Jan) niper 34

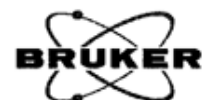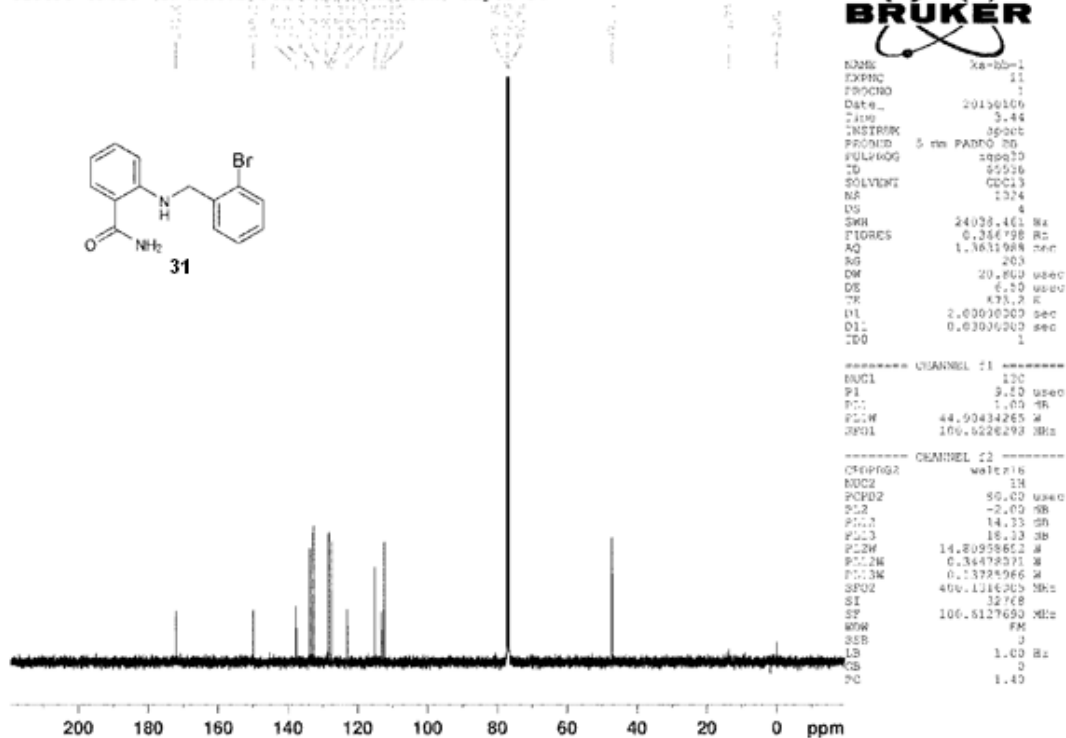

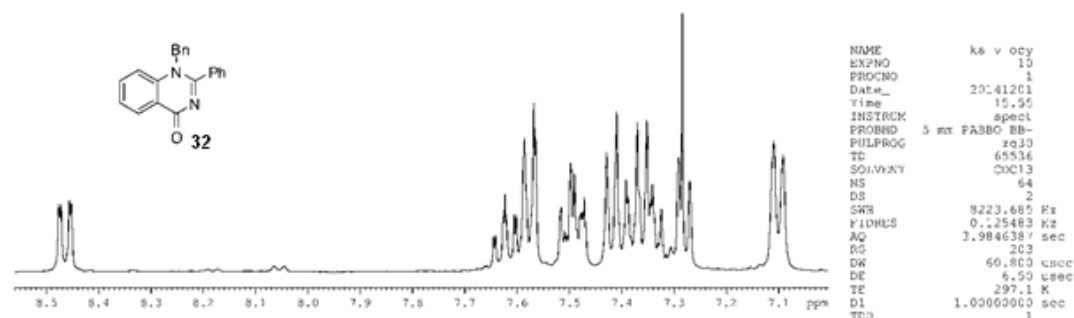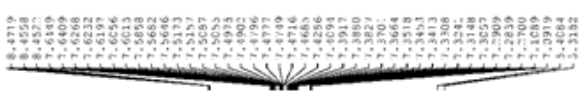

```

NAME      ks v ocy
EXPNO     15
PROCNO    1
Date_     20141201
Time      15.55
INSTRUM   spect
PROBHD    5 mm PABBO BB-
PULPROG   zg30
TD         65536
SOLVENT   CDCl3
NS         64
DS         2
SWH        8223.685 Hz
FIDRES     0.25483 Hz
AQ         3.9846387 sec
RG         203
DW         60.800 usec
DE         6.50 usec
TE         297.1 K
D1         1.0000000 sec
D11        1
D12        1
D13        1
D14        1
D15        1
D16        1
D17        1
D18        1
D19        1
D20        1
D21        1
D22        1
D23        1
D24        1
D25        1
D26        1
D27        1
D28        1
D29        1
D30        1
D31        1
D32        1
D33        1
D34        1
D35        1
D36        1
D37        1
D38        1
D39        1
D40        1
D41        1
D42        1
D43        1
D44        1
D45        1
D46        1
D47        1
D48        1
D49        1
D50        1
D51        1
D52        1
D53        1
D54        1
D55        1
D56        1
D57        1
D58        1
D59        1
D60        1
D61        1
D62        1
D63        1
D64        1
D65        1
D66        1
D67        1
D68        1
D69        1
D70        1
D71        1
D72        1
D73        1
D74        1
D75        1
D76        1
D77        1
D78        1
D79        1
D80        1
D81        1
D82        1
D83        1
D84        1
D85        1
D86        1
D87        1
D88        1
D89        1
D90        1
D91        1
D92        1
D93        1
D94        1
D95        1
D96        1
D97        1
D98        1
D99        1
D100       1
    
```

```

===== CHANNEL f1 =====
NUC1      13C
P1         12.20 usec
PL1        -2.00 dB
PL12W     14.80958652 W
SFO1      400.1324710 MHz
SI         32768
SF         400.1300000 MHz
MCH        EM
SSB        0
LB         0.30 Hz
GB         0
PC         1.40
    
```

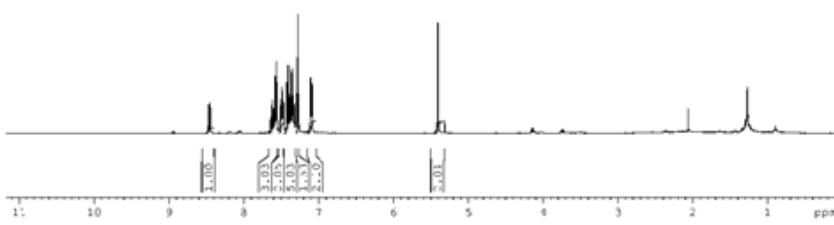

ks-v-ocy  
C13CPD CDCl3 (D:\FACULTY\JRLaha\2014\Dec) niper 24

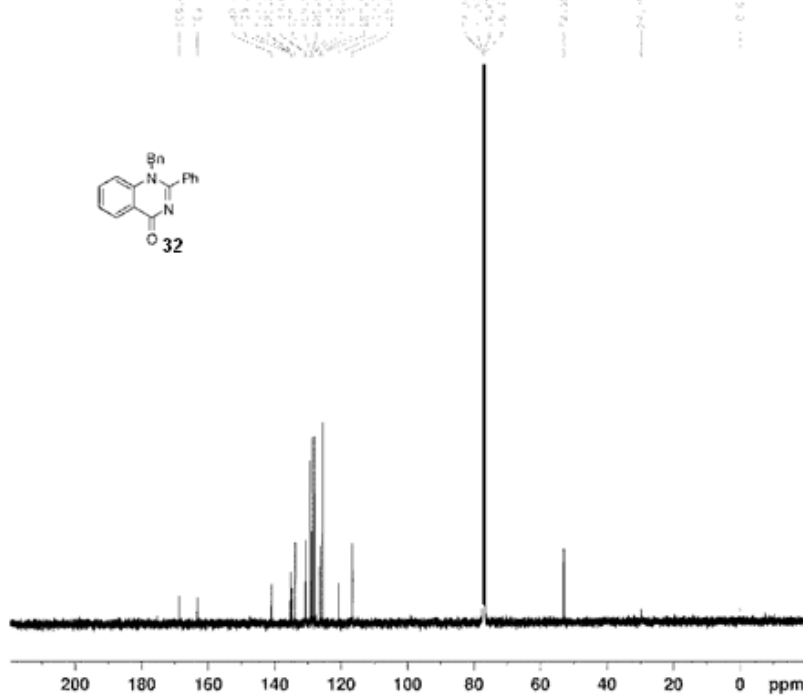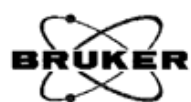

```

NAME      ks v ocy
EXPNO     11
PROCNO    1
Date_     20141202
Time      1.52
INSTRUM   spect
PROBHD    5 mm PABBO BB-
PULPROG   zgpg30
TD         65536
SOLVENT   CDCl3
NS         1500
DS         4
SWH        24038.461 Hz
FIDRES     0.364798 Hz
AQ         1.3823168 sec
RG         26.3
DW         20.800 usec
DE         6.50 usec
TE         298.2 K
D1         2.0000000 sec
D11        1.0000000 sec
D12        1
D13        1
D14        1
D15        1
D16        1
D17        1
D18        1
D19        1
D20        1
D21        1
D22        1
D23        1
D24        1
D25        1
D26        1
D27        1
D28        1
D29        1
D30        1
D31        1
D32        1
D33        1
D34        1
D35        1
D36        1
D37        1
D38        1
D39        1
D40        1
D41        1
D42        1
D43        1
D44        1
D45        1
D46        1
D47        1
D48        1
D49        1
D50        1
D51        1
D52        1
D53        1
D54        1
D55        1
D56        1
D57        1
D58        1
D59        1
D60        1
D61        1
D62        1
D63        1
D64        1
D65        1
D66        1
D67        1
D68        1
D69        1
D70        1
D71        1
D72        1
D73        1
D74        1
D75        1
D76        1
D77        1
D78        1
D79        1
D80        1
D81        1
D82        1
D83        1
D84        1
D85        1
D86        1
D87        1
D88        1
D89        1
D90        1
D91        1
D92        1
D93        1
D94        1
D95        1
D96        1
D97        1
D98        1
D99        1
D100       1
    
```

```

===== CHANNEL f1 =====
NUC1      13C
P1         9.50 usec
PL1        1.00 dB
PL12W     11.90434265 W
SFO1      100.6228258 MHz

===== CHANNEL f2 =====
CH01f02   wait:15
NUC2      1H
P2         50.00 usec
PL2        -2.00 dB
PL12      14.35 dB
PL13      18.33 dB
PL12W     14.80958652 W
PL13W     0.34478071 W
PL13W     1.17255665 W
SFO2      400.1114625 MHz
SI         32768
SF         100.6127650 MHz
MCH        EM
SSB        0
LB         1.00 Hz
GB         0
PC         1.40
    
```

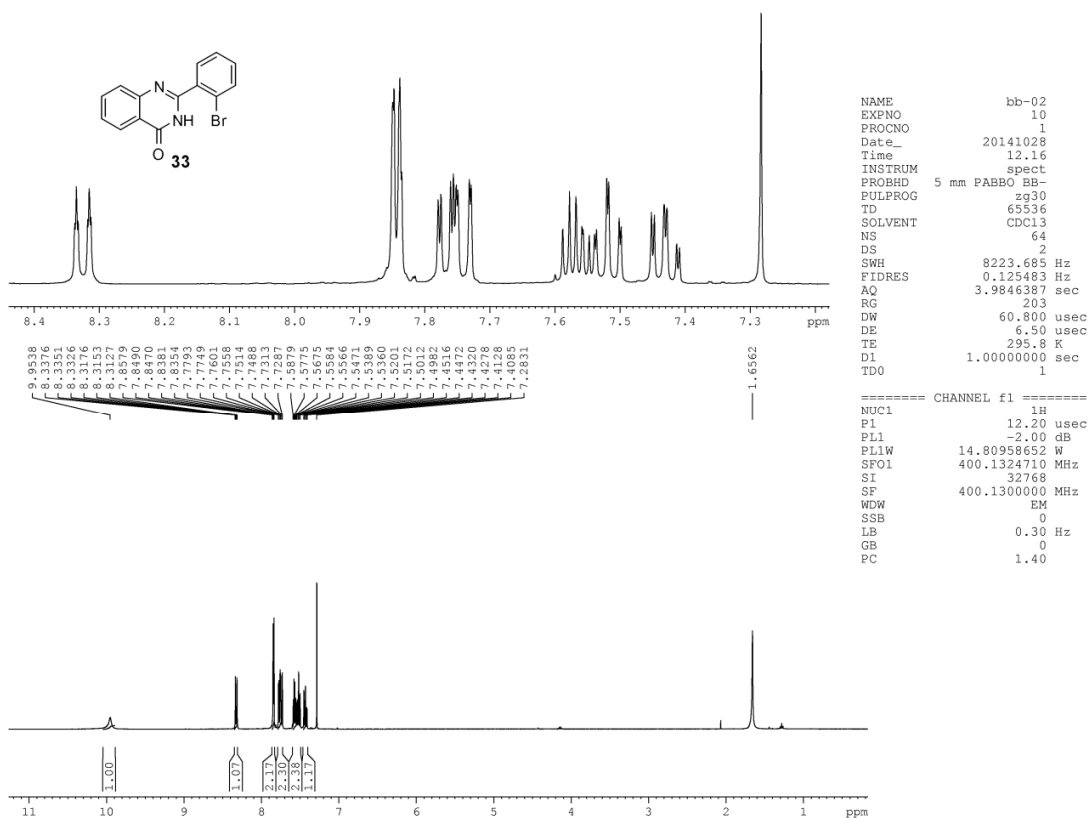

bb-02  
C13CPD CDC13 {D:\FACULTY\JKLaha\2014\Oct} niper 11

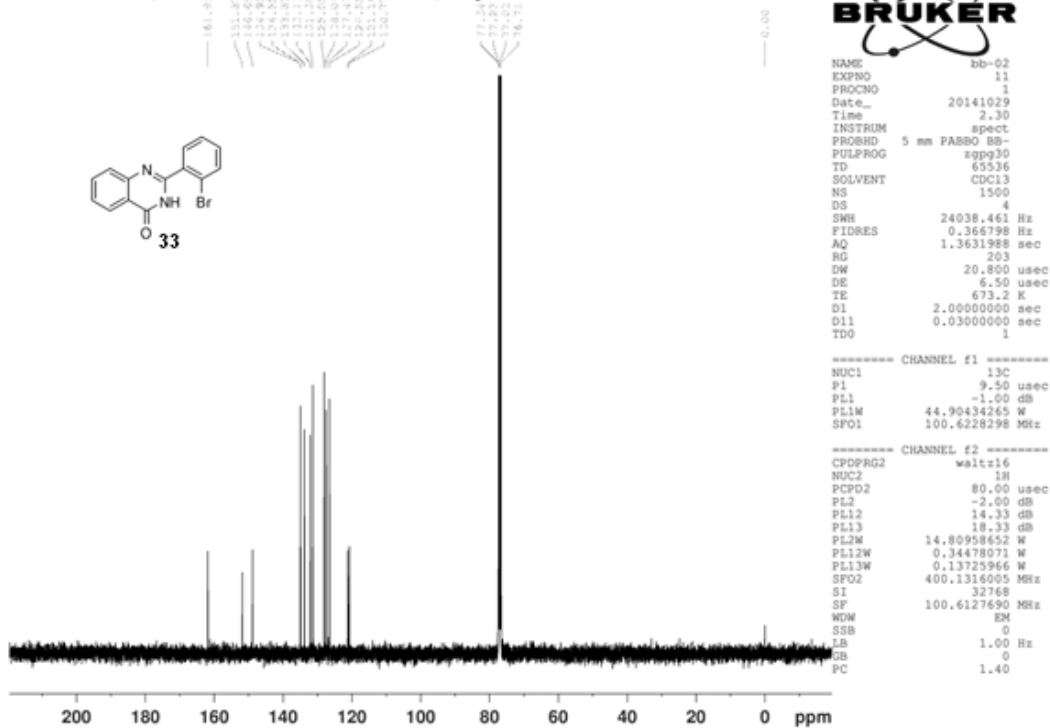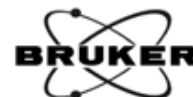

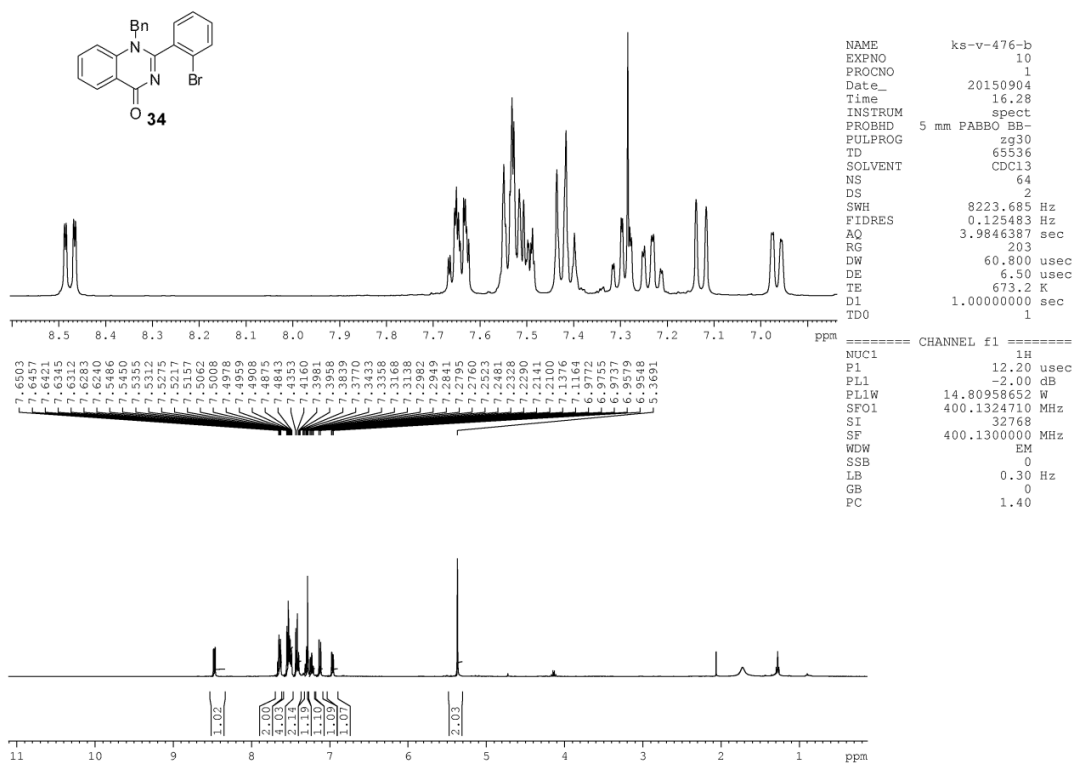

NAME ks-v-476-b  
EXPNO 10  
PROCNO 1  
Date\_ 20150904  
Time 16.28  
INSTRUM spect  
PROBHD 5 mm PABBO BB-  
PULPROG zg30  
TD 65536  
SOLVENT CDCl3  
NS 64  
DS 2  
SWH 8223.685 Hz  
FIDRES 0.125483 Hz  
AQ 3.9846387 sec  
RG 203  
DW 60.800 usec  
DE 6.50 usec  
TE 673.2 K  
D1 1.00000000 sec  
TD0 1

===== CHANNEL f1 =====  
NUC1 1H  
P1 12.20 usec  
PL1 -2.00 dB  
PL1W 14.80958652 W  
SFO1 400.1324710 MHz  
SI 32768  
SF 400.1300000 MHz  
WDW EM  
SSB 0  
LB 0.30 Hz  
GB 0  
PC 1.40

ks-v-476-b  
C13CPD CDC13 {D:\CIL\JKLaha\_108\NMR\2015\Sep} Administrator 20

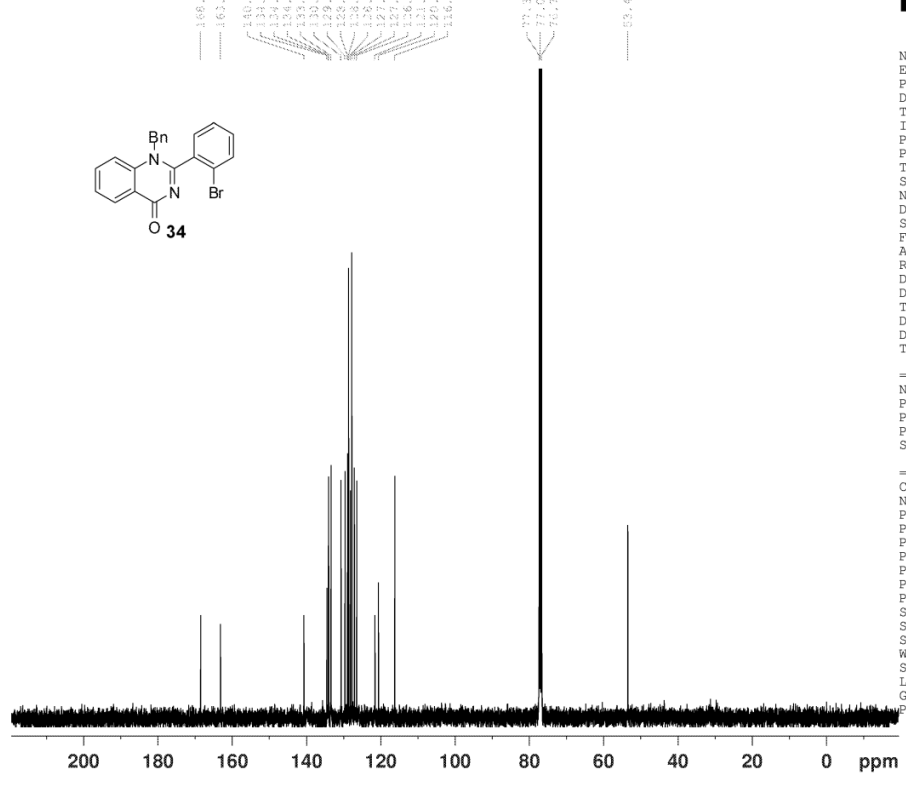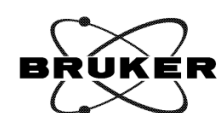

NAME ks-v-476-b  
EXPNO 11  
PROCNO 1  
Date\_ 20150905  
Time 7.29  
INSTRUM spect  
PROBHD 5 mm PABBO BB-  
PULPROG zgpg30  
TD 65536  
SOLVENT CDCl3  
NS 1024  
DS 4  
SWH 24038.461 Hz  
FIDRES 0.366798 Hz  
AQ 1.3631988 sec  
RG 203  
DW 20.800 usec  
DE 6.50 usec  
TE 673.2 K  
D1 2.00000000 sec  
D11 0.03000000 sec  
TD0 1

===== CHANNEL f1 =====  
NUC1 13C  
P1 9.50 usec  
PL1 -1.00 dB  
PL1W 44.90434265 W  
SFO1 100.6228298 MHz

===== CHANNEL f2 =====  
CPDPRG2 waltz16  
NUC2 1H  
PCPD2 80.00 usec  
PL2 -2.00 dB  
PL12 14.33 dB  
PL13 18.33 dB  
PL2W 14.80958652 W  
PL12W 0.34478071 W  
PL13W 0.13725966 W  
SFO2 400.1316005 MHz  
SI 32768  
SF 100.6127690 MHz  
WDW EM  
SSB 0  
LB 1.00 Hz  
GB 0  
PC 1.40



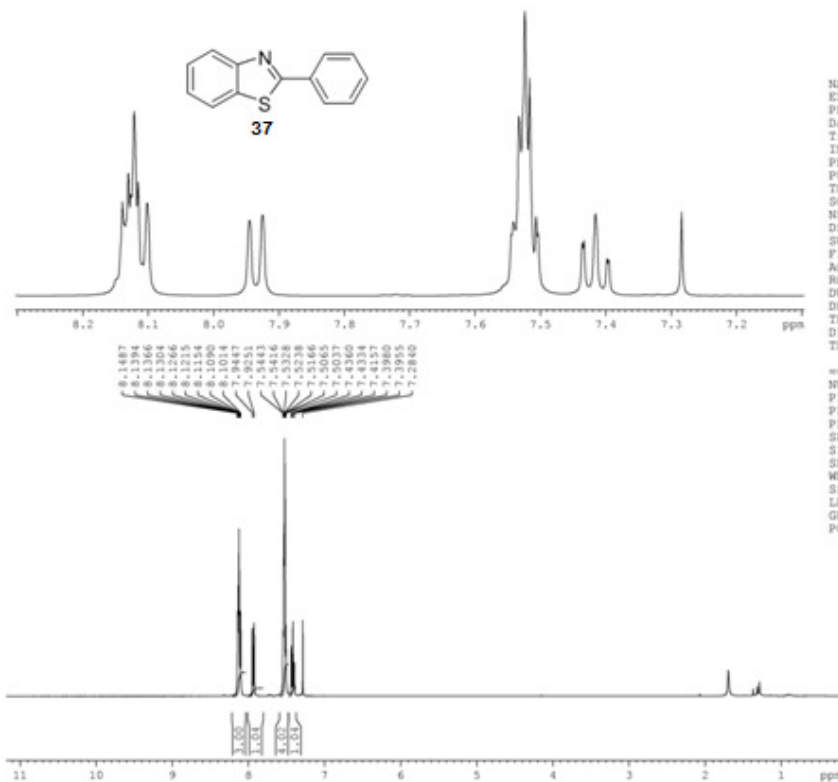

NAME ks-v-572  
EXPNO 10  
PROCNO 1  
Date\_ 20151020  
Time 16.50  
INSTRUM spect  
PROBHD 5 mm PABBO BB-  
PULPROG zg30  
TD 65536  
SOLVENT CDCl3  
NS 64  
DS 2  
SWH 8223.685 Hz  
FIDRES 0.125483 Hz  
AQ 3.9846387 sec  
RG 203  
DW 60.800 usec  
DE 6.50 usec  
TE 673.2 K  
D1 1.0000000 sec  
TDO 1

===== CHANNEL f1 =====  
NUC1 1H  
P1 12.20 usec  
PL1 -2.00 dB  
PL1W 14.80958652 W  
SFO1 400.1324710 MHz  
SI 32768  
SF 400.1300000 MHz  
MDW EM  
SSB 0  
LB 0.30 Hz  
GB 0  
PC 1.40

ks-v-572  
C13CPD512 CDCl3 {D:\C11\JKLaha\_108\NMR\2015\Oct} Administrator 28

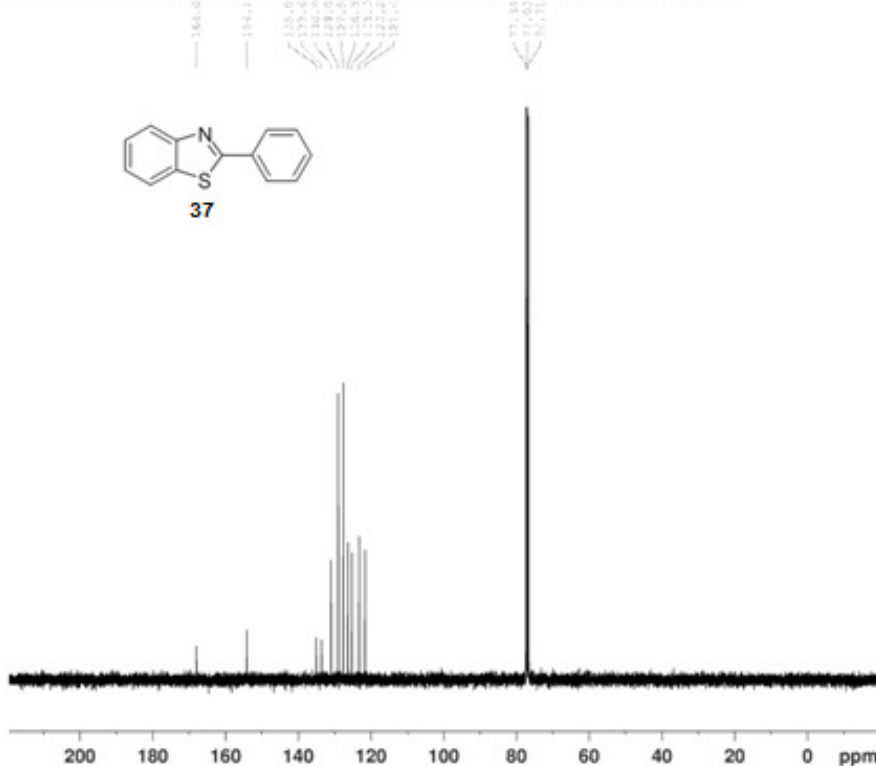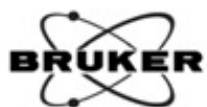

NAME ks-v-572  
EXPNO 11  
PROCNO 1  
Date\_ 20151021  
Time 1.49  
INSTRUM spect  
PROBHD 5 mm PABBO BB-  
PULPROG zgpg30  
TD 65536  
SOLVENT CDCl3  
NS 512  
DS 4  
SWH 24038.461 Hz  
FIDRES 0.366798 Hz  
AQ 1.3631988 sec  
RG 203  
DW 20.800 usec  
DE 6.50 usec  
TE 299.7 K  
D1 2.0000000 sec  
D11 0.0300000 sec  
TDO 1

===== CHANNEL f1 =====  
NUC1 13C  
P1 9.50 usec  
PL1 -1.00 dB  
PL1W 44.90434265 W  
SFO1 100.6228298 MHz

===== CHANNEL f2 =====  
CPDPRG2 waltz16  
NUC2 1H  
PCPD2 80.00 usec  
PL2 -2.00 dB  
PL12 14.33 dB  
PL13 18.33 dB  
PL2W 14.80958652 W  
PL12W 0.34478071 W  
PL13W 0.13725966 W  
SFO2 400.1316005 MHz  
SI 32768  
SF 100.6127690 MHz  
MDW EM  
SSB 0  
LB 1.00 Hz  
GB 0  
PC 1.40
